# Supplementary material for: eHealth inequalities in a universal healthcare system: a cross-sectional study on the role of social determinants in knowledge and use
Source: Research Square preprint supplement (doi:10.21203/rs.3.rs-8500757/v1), 2026-01-12
Supplement: Supplementary file 1 [file cc3a542b410b60c15174e3df.docx]

**SUPPLEMENTARY MATERIAL**

**Supplementary Table 1: Description of the sample and prevalence of use of digital tools to access the national health system according to socio-demographic and health variables, stratified by sex (ESCAV 2023).**

|  |  |  | **Online appointment booking** | | | | **Electronic health records** | | | | **eHealth Portal** | | | |
| --- | --- | --- | --- | --- | --- | --- | --- | --- | --- | --- | --- | --- | --- | --- |
|  |  |  | **Men** | | **Women** | | **Men** | | **Women** | | **Men** | | **Women** | |
|  | Men 2610 (45.9%) | Women  3073 (54.1%) | Knows (77%) | Uses (55%) | Knows (76.1%) | Uses (54.4%) | Knows (44.6%) | Uses (23.8%) | Knows (48.5%) | Uses (25.9%) | Knows (44.9%) | Uses (20.7%) | Knows (44.4%) | Uses (21.6%) |
| **Age** |  |  |  |  |  |  |  |  |  |  |  |  |  |  |
| 18-35 | 198 (3.5%) | 230 (4.0%) | 87.9% | 68.0% | 88.3% | 67.8% | 50.5% | 31.8% | 61.7% | 37.4% | 64.1% | 28.4% | 64.3% | 34.3% |
| 36-50 | 617 (10.9%) | 698 (12.3%) | 89.3% | 70.4% | 91.7% | 77.1% | 54.0% | 31.7% | 67.0% | 42.1% | 56.1% | 29.5% | 63.5% | 38.4% |
| 51-65 | 860 (15.1%) | 958 (16.9%) | 81.2% | 57.7% | 88.0% | 65.3% | 48.8% | 27.6% | 60.8% | 32.9% | 51.9% | 24.7% | 52.7% | 25.3% |
| 66-79 | 688 (12.1%) | 763 (13.4%) | 67.3% | 43.6% | 62.1% | 33.9% | 39.2% | 16.7% | 31.3% | 10.8% | 31.4% | 11.5% | 27.5% | 8.0% |
| 80 and more | 209 (3.7%) | 385 (6.8%) | 47.4% | 28.7% | 40.3% | 21.3% | 14.8% | 3.8% | 12.7% | 3.9% | 11.5% | 3.8% | 13.5% | 3.4% |
| **Deprivation Index** |  |  |  |  |  |  |  |  |  |  |  |  |  |  |
| 1 | 467 (8.2%) | 513 (9.0%) | 80.1% | 58.2% | 77.4% | 58.1% | 47.8% | 26.6% | 53.0% | 30.4% | 46.0% | 21.7% | 45.0% | 22.6% |
| 2 | 551 (9.7%) | 615 (10.8%) | 78.8% | 57.0% | 80.8% | 59.8% | 42.8% | 24.2% | 53.3% | 26.1% | 42.6% | 20.5% | 47.5% | 23.1% |
| 3 | 557 (9.8%) | 640 (11.3%) | 74.9% | 53.5% | 73.4% | 50.5% | 44.5% | 23.2% | 46.2% | 26.2% | 43.3% | 18.9% | 43.6% | 21.9% |
| 4 | 556 (9.8%) | 665 (11.7%) | 79.3% | 57.7% | 76.8% | 53.3% | 46.0% | 25.2% | 46.9% | 23.3% | 46.2% | 22.2% | 43.9% | 21.4% |
| 5 | 479 (8.4%) | 640 (11.3%) | 71.6% | 48.2% | 72.3% | 51.3% | 41.8% | 19.7% | 43.9% | 24.3% | 46.6% | 20.2% | 42.3% | 19.4% |
| **Occupational Social Class** |  |  |  |  |  |  |  |  |  |  |  |  |  |  |
| I | 372 (6.5%) | 349 (6.1%) | 89.0% | 68.1% | 91.4% | 73.4% | 61.3% | 35.8% | 72.5% | 45.8% | 54.6% | 25.7% | 57.9% | 28.9% |
| II | 232 (4.1%) | 256 (4.5%) | 81.5% | 62.4% | 86.7% | 67.1% | 53.4% | 33.0% | 66.4% | 36.7% | 52.6% | 28.4% | 55.5% | 27.1% |
| III | 503 (8.9%) | 709 (12.5%) | 78.5% | 60.7% | 82.7% | 63.9% | 47.3% | 23.7% | 58.8% | 32.9% | 46.3% | 21.2% | 49.1% | 25.5% |
| IV | 1202 (21.2%) | 1135 (20.0%) | 74.4% | 50.5% | 70.1% | 47.2% | 37.9% | 19.9% | 39.6% | 18.9% | 41.8% | 18.8% | 40.2% | 19.2% |
| V | 290 (5.1%) | 591 (10.4%) | 65.5% | 41.0% | 66.8% | 40.9% | 38.6% | 16.9% | 31.8% | 14.3% | 36.2% | 15.5% | 35.4% | 15.1% |
| **Educational level** |  |  |  |  |  |  |  |  |  |  |  |  |  |  |
| Primary or lower | 369 (6.5%) | 582 (10.2%) | 47.4% | 32.2% | 45.9% | 29.1% | 23.0% | 9.2% | 18.9% | 6.0% | 18.4% | 7.6% | 15.6% | 7.2% |
| Lower secondary | 536 (9.4%) | 690 (12.1%) | 70.9% | 42.2% | 70.9% | 38.8% | 33.0% | 13.1% | 34.8% | 12.8% | 40.1% | 14.4% | 38.3% | 13.5% |
| Higher secondary | 1136 (20.0%) | 1046 (18.4%) | 83.5% | 61.5% | 85.3% | 64.7% | 48.9% | 26.3% | 56.2% | 31.7% | 49.1% | 23.5% | 53.3% | 28.5% |
| University | 554 (9.7%) | 745 (13.1%) | 88.6% | 69.1% | 91.5% | 74.2% | 61.2% | 38.5% | 73.4% | 45.1% | 58.3% | 29.6% | 60.5% | 30.8% |
| **Health system use tertile** |  |  |  |  |  |  |  |  |  |  |  |  |  |  |
| Low use | 767 (13.5%) | 890 (15.7%) | 81.1% | 61.9% | 79.7% | 61.2% | 44.5% | 22.8% | 47.6% | 24.6% | 42.8% | 20.8% | 43.4% | 21.3% |
| Medium use | 639 (11.2%) | 818 (14.4%) | 77.3% | 54.2% | 75.6% | 52.1% | 45.7% | 26.6% | 47.4% | 24.0% | 48.0% | 23.9% | 46.1% | 21.8% |
| High use | 427 (7.5%) | 657 (11.6%) | 71.4% | 45.4% | 72.3% | 49.0% | 39.3% | 21.1% | 47.9% | 27.7% | 41.5% | 19% | 43.7% | 22.8% |
| **Chronic disease** |  |  |  |  |  |  |  |  |  |  |  |  |  |  |
| Yes | 1432 (25.2%) | 1811 (31.9%) | 77.0% | 50.6% | 74.2% | 48.4% | 43.7% | 22.7% | 45.0% | 23.0% | 46.9% | 20.5% | 44.3% | 19.7% |
| No | 1171 (20.6%) | 1255 (22.1%) | 77.1% | 60.4% | 78.9% | 63.0% | 45.8% | 25.3% | 53.6% | 30.1% | 42.4% | 20.9% | 44.7% | 24.5% |
| **Health limitation** |  |  |  |  |  |  |  |  |  |  |  |  |  |  |
| Yes | 78 (1.4%) | 71 (1.2%) | 69.2% | 42.3% | 53.5% | 23.9% | 42.3% | 19.2% | 32.4% | 11.3% | 37.2% | 16.7% | 26.8% | 14.1% |
| No | 2153 (37.9%) | 2481 (43.7%) | 78.2% | 57.2% | 79.5% | 58.4% | 46.3% | 25.1% | 50.7% | 27.0% | 46.7% | 21.6% | 46.6% | 22.5% |

**Supplementary Table 2: Crude and adjusted prevalence ratios of not knowing the digital tools for accessing the national health system (online appointment booking, personal health folder, and the Osakidetza app) according to social determinants of health, including stratified and pooled analyses by sex (ESCAV 2023).**

|  | **Online appointment booking** | | | **Electronic health records** | | | **eHealth Portal** | | |
| --- | --- | --- | --- | --- | --- | --- | --- | --- | --- |
|  | **Model 3** | | | **Model 3** | | | **Model 3** | | |
| **Social determinants of health** | **PR (CI95%)** | | | **PR (CI95%)** | | | **PR (CI95%)** | | |
|  |
| **Sex** |  |  |  |  |  |  |  |  |  |  |
| Men | **1** | | | **1** | | | **1** | | |  |
| Women | 1.01 (0.91–1.13) | | | 0.91 (0.87–0.97)* | | | 0.99 (0.94–1.04) | | |  |
|  | **M** | **W** | **p value for sex interaction** | **M** | **W** | **p value for sex interaction** | **M** | **W** | **p value for sex interaction** |  |
|  | **PR (CI95%)** | **PR (CI95%)** | **PR (CI95%)** | **PR (CI95%)** | **PR (CI95%)** | **PR (CI95%)** |  |
| **Age** |  |  |  |  |  |  |  |  |  |  |
| 18-35 | 1 | 1 |  | 1 | 1 |  | 1 | 1 |  |  |
| 36-50 | 0.71 (0.41–1.25) | 0.69 (0.41–1.13) | 0.945 | 0.78 (0.64–0.94) | 0.87 (0.69–1.09) | 0.429 | 1.12 (0.86–1.47) | 1.02 (0.82–1.27) | 0.612 |  |
| 51-65 | 1.38 (0.84–2.27) | 1.10 (0.70–1.71) | 0.564 | 0.89 (0.74–1.06) | 1.09 (0.88–1.34) | 0.123 | 1.41 (1.10–1.82)* | 1.32 (1.07–1.62)* | 0.716 |  |
| 66-79 | 2.45 (1.51–3.98)* | 3.47 (2.30–5.25)* | 0.228 | 1.09 (0.91–1.30) | 1.86 (1.52–2.27)* | 0.000* | 2.08 (1.63–2.66)* | 2.12 (1.74–2.58)* | 0.830 |  |
| 80 and more | 4.13 (2.53–6.72)* | 5.49 (3.64–8.28)* | 0.328 | 1.50 (1.26–1.78)* | 2.38 (1.95–2.90)* | 0.000* | 2.68 (2.10–3.43)* | 2.60 (2.14–3.17)* | 0.925 |  |
| **Educational level** |  |  |  |  |  |  |  |  |  |  |
| University | 1 | 1 |  | 1 | 1 |  | 1 | 1 |  |  |
| Higher secondary | 1.73 (1.20–2.50)* | 1.51 (1.11–2.07)* | 0.765 | 1.36 (1.17–1.58)* | 1.58 (1.35–1.85)* | 0.005* | 1.18 (1.03–1.36)* | 1.13 (0.99–1.28) | 0.841 |  |
| Lower secondary | 2.52 (1.74–3.64)* | 2.14 (1.56–2.94*) | 0.811 | 1.74 (1.49–2.03)* | 1.95 (1.66–2.27)* | 0.035* | 1.29 (1.12–1.49)* | 1.23 (1.08–1.39)* | 0.630 |  |
| Primary and lower | 4.03 (2.79–5.80)* | 3.26 (2.37–4.48)* | 0.566 | 1.91 (1.64–2.24)* | 2.22 (1.90–2.59)* | 0.135 | 1.56 (1.36–1.79)* | 1.57 (1.39–1.77)* | 0.539 |  |
| **Occupational social class** |  |  |  |  |  |  |  |  |  |  |
| I | 1 | 1 |  | 1 | 1 |  | 1 | 1 |  |  |
| II | 1.81 (1.11–2.95)* | 1.76 (1.03–2.99)* | 0.903 | 1.21 (0.97–1.52) | 1.24 (0.95–1.61) | 0.649 | 1.04 (0.85–1.27) | 1.04 (0.85–1.26) | 0.912 |  |
| III | 2.21 (1.46–3.35)* | 2.00 (1.26–3.17)* | 0.762 | 1.35 (1.12–1.62)* | 1.36 (1.10–1.69)* | 0.604 | 1.18 (1.01–1.38)* | 1.07 (0.91–1.26) | 0.332 |  |
| IV | 2.37 (1.61–3.49)* | 2.66 (1.71–4.13)* | 0.588 | 1.59 (1.35–1.87)* | 1.79 (1.46–2.20)* | 0.116 | 1.24 (1.08–1.42)* | 1.13 (0.97–1.31) | 0.401 |  |
| V | 3.15 (2.08–4.77)* | 3.13 (2.00–4.91)* | 0.943 | 1.63 (1.35–1.96)* | 2.05 (1.67–2.53)* | 0.028* | 1.35 (1.15–1.58)* | 1.27 (1.09–1.48)* | 0.606 |  |
| **Health limitation** |  |  |  |  |  |  |  |  |  |  |
| No | 1 | 1 |  | 1 | 1 |  | 1 | 1 |  |  |
| Yes | 1.15 (0.79–1.67) | 1.37 (1.02–1.85)* | 0.236 | 0.94 (0.75–1.17) | 1.03 (0.88–1.21) | 0.195 | 1.06 (0.87–1.29) | 1.13 (0.96–1.33) | 0.400 |  |
| **Deprivation index** |  |  |  |  |  |  |  |  |  |  |
| 1 | 1 | 1 |  | 1 | 1 |  | 1 | 1 |  |  |
| 2 | 1.28 (0.95–1.72) | 0.91 (0.71–1.16) | 0.102 | 1.11 (0.97–1.28) | 1.04 (0.91–1.19) | 0.569 | 1.07 (0.94–1.21) | 0.98 (0.87–1.10) | 0.361 |  |
| 3 | 1.69 (1.28–2.24)* | 1.17 (0.93–1.46) | 0.040* | 1.13 (0.99–1.30) | 1.17 (1.03–1.33)* | 0.789 | 1.10 (0.97–1.25) | 1.01 (0.90–1.13) | 0.301 |  |
| 4 | 1.43 (1.06–1.92)* | 1.06 (0.85–1.33) | 0.111 | 1.16 (1.02–1.33)* | 1.15 (1.02–1.31)* | 0.808 | 1.10 (0.97–1.25) | 1.01 (0.90–1.12) | 0.313 |  |
| 5 | 1.74 (1.30–2.33)* | 1.31 (1.05–1.64)* | 0.144 | 1.25 (1.09–1.43)* | 1.27 (1.13–1.44)* | 0.883 | 1.06 (0.92–1.21) | 1.08 (0.97–1.21) | 0.768 |  |

**Model 3**: model 2+adjustment by tertile of use+chronic disease; **M**: Men; **W**: Women; **PR**: Prevalence ratio; **CI**: Confidence interval; ***:** indicates statistical significance.

**Supplementary table 3: Crude and adjusted prevalence ratios for not using the digital tools for accessing the national health system (web appointment, health folder, and the Osakidetza app) according to social determinants of health, including stratified and pooled analyses by sex (ESCAV 2023).**

|  | **Online appointment booking** | | | | | | **Electronic health records** | | | | | | | | **eHealth Portal** | | | | | | | |
| --- | --- | --- | --- | --- | --- | --- | --- | --- | --- | --- | --- | --- | --- | --- | --- | --- | --- | --- | --- | --- | --- | --- |
|  | **Model 3** | | | **Model 4** | | | **Model 3** | | | | **Model 4** | | | | **Model 3** | | | | **Model 4** | | | |
| **Social determinants of health** | **PR (CI95%)** | | | **PR (CI95%)** | | | **PR (CI95%)** | | | | **PR (CI95%)** | | | | **PR (CI95%)** | | | | **PR (CI95%)** | | | |
|  | |
| **Sex** |  |  |  |  |  |  |  |  |  |  | |  |  |  | |  |  |  | |  |  |  | |
| Men | **1** | | | **1** | | | **1** | | | | **1** | | | | **1** | | | | **1** | | | |  | |
| Women | 1.00 (0.94–1.07) | | | 0.99 (0.94–1.04) | | | 0.98 (0.94–1.01) | | | | 1.01 (0.98–1.03) | | | | 0.99 (0.96–1.02) | | | | 1.00 (0.97–1.02) | | | |  | |
|  | **M** | **W** | **p value for sex interaction** | **M** | **W** | **p value for sex interaction** | **M** | **W** | **p value for sex interaction** | **M** | | **W** | **p value for sex interaction** | **M** | | **W** | **p value for sex interaction** | **M** | | **W** | **p value for sex interaction** |  | |
|  | **PR (CI95%)** | **PR (CI95%)** | **PR (CI95%)** | **PR (CI95%)** | **PR (CI95%)** | **PR (CI95%)** | **PR (CI95%)** | | **PR (CI95%)** | **PR (CI95%)** | | **PR (CI95%)** | **PR (CI95%)** | | **PR (CI95%)** |  | |
| **Age** |  |  |  |  |  |  |  |  |  |  | |  |  |  | |  |  |  | |  |  |  | |
| 18-35 | 1 | 1 |  | 1 | 1 | 1 | 1 | 1 | 1 | 1 | | 1 | 1 | 1 | | 1 | 1 | 1 | | 1 | 1 |  | |
| 36-50 | 0.78 (0.57–1.06) | 0.75 (0.57–1.00) | 0.890 | 0.83 (0.64–1.08) | 0.80 (0.62–1.03) | 0.868 | 0.93 (0.81–1.06) | 0.91 (0.79–1.03) | 0.823 | 1.02 (0.93–1.13) | | 0.94 (0.84–1.05) | 0.313 | 0.94 (0.82–1.08) | | 0.95 (0.83–1.08) | 0.898 | 0.91 (0.81–1.02) | | 0.94 (0.85–1.05) | 0.650 |  | |
| 51-65 | 1.17 (0.89–1.53) | 1.22 (0.95–1.57) | 0.812 | 1.09 (0.86–1.38) | 1.21 (0.97–1.50) | 0.545 | 1.00 (0.88–1.13) | 1.06 (0.94–1.20) | 0.463 | 1.05 (0.96–1.15) | | 1.04 (0.94–1.15) | 0.901 | 1.08 (0.95–1.23) | | 1.14 (1.02–1.29)* | 0.502 | 0.97 (0.87–1.09) | | 1.06 (0.96–1.17) | 0.297 |  | |
| 66-79 | 1.55 (1.18–2.02)* | 2.33 (1.84–2.95)* | 0.024* | 1.20 (0.95–1.51) | 1.67 (1.36–2.06)* | 0.056 | 1.17 (1.03–1.32)* | 1.42 (1.26–1.59)* | 0.015* | 1.13 (1.03–1.24)* | | 1.15 (1.04–1.26)* | 0.918 | 1.28 (1.13–1.44)* | | 1.46 (1.31–1.64)* | 0.095 | 1.01 (0.90–1.12) | | 1.15 (1.05–1.26)* | 0.075 |  | |
| 80 and more | 1.95 (1.48–2.56)* | 2.68 (2.11–3.39)* | 0.084 | 1.17 (0.93–1.48) | 1.55 (1.26–1.91)* | 0.159 | 1.35 (1.20–1.52)* | 1.53 (1.37–1.72)* | 0.125 | 1.13 (1.03–1.24)* | | 1.11 (1.01–1.22)* | 0.603 | 1.39 (1.23–1.58)* | | 1.53 (1.36–1.71)* | 0.258 | 0.99 (0.89–1.10) | | 1.11 (1.01–1.21)* | 0.150 |  | |
| **Educational level** |  |  |  |  |  |  |  |  |  |  | |  |  |  | |  |  |  | |  |  |  | |
| University | 1 | 1 |  | 1 | 1 | 1 | 1 | 1 | 1 | 1 | | 1 | 1 | 1 | | 1 | 1 | 1 | | 1 | 1.000 |  | |
| Higher secondary | 1.35 (1.12–1.63)* | 1.43 (1.20–1.71)* | 0.230 | 1.20 (1.02–1.42)* | 1.43 (1.22–1.66)* | 0.097 | 1.22 (1.11–1.34)* | 1.25 (1.14–1.37)* | 0.148 | 1.14 (1.06–1.23)* | | 1.12 (1.04–1.21)* | 0.713 | 1.10 (1.02–1.20)* | | 1.03 (0.96–1.11) | 0.622 | 1.05 (0.98–1.12) | | 1.00 (0.94–1.06) | 0.428 |  | |
| Lower secondary | 1.87 (1.55–2.26)* | 2.06 (1.74–2.45)* | 0.123 | 1.49 (1.26–1.77)* | 1.34 (1.15–1.57)* | 0.046* | 1.42 (1.29–1.56)* | 1.47 (1.35–1.60)* | 0.198 | 1.17 (1.08–1.26)* | | 1.22 (1.14–1.32)* | 0.476 | 1.21 (1.11–1.31)* | | 1.16 (1.08–1.24)* | 0.807 | 1.12 (1.05–1.20)* | | 1.10 (1.03–1.16)* | 0.948 |  | |
| Primary and lower | 1.96 (1.61–2.38)* | 2.00 (1.67–2.38)* | 0.605 | 1.24 (1.05–1.48)* | 1.78 (1.53–2.08)* | 0.332 | 1.45 (1.32–1.59)* | 1.49 (1.37–1.62)* | 0.613 | 1.14 (1.06–1.23)* | | 1.18 (1.09–1.26)* | 0.879 | 1.24 (1.14–1.34)* | | 1.17 (1.09–1.25)* | 0.262 | 1.06 (1.00–1.14) | | 1.00 (0.94–1.05) | 0.345 |  | |
| **Occupational social class** |  |  |  |  |  |  |  |  |  |  | |  |  |  | |  |  |  | |  |  |  | |
| I | 1 | 1 |  | 1 | 1 | 1 | 1 | 1 | 1 | 1 | | 1 | 1 | 1 | | 1 |  | 1 | | 1 | 1 |  | |
| II | 1.24 (0.96–1.60) | 1.34 (1.00–1.80)* | 0.631 | 1.07 (0.85–1.34) | 1.23 (0.94–1.61) | 0.389 | 1.08 (0.94–1.24) | 1.19 (1.02–1.39)* | 0.237 | 1.01 (0.9–1.13) | | 1.14 (1.00–1.3) | 0.168 | 0.96 (0.84–1.08) | | 0.99 (0.88–1.12) | 0.742 | 0.94 (0.85–1.04) | | 0.98 (0.89–1.09) | 0.626 |  | |
| III | 1.22 (0.98–1.53) | 1.43 (1.12–1.84)* | 0.335 | 0.99 (0.82–1.21) | 1.30 (1.04–1.63)* | 0.096 | 1.19 (1.06–1.33)* | 1.24 (1.09–1.41)* | 0.464 | 1.07 (0.98–1.17) | | 1.15 (1.03–1.29)* | 0.340 | 1.03 (0.94–1.14) | | 1.02 (0.93–1.12) | 0.919 | 0.98 (0.91–1.06) | | 1.00 (0.93–1.08) | 0.604 |  | |
| IV | 1.51 (1.25–1.83)* | 1.90 (1.51–2.40)* | 0.077 | 1.21 (1.02–1.44)* | 1.58 (1.27–1.97)* | 0.055 | 1.26 (1.14–1.39)* | 1.42 (1.26–1.60)* | 0.060 | 1.07 (0.98–1.16) | | 1.21 (1.09–1.34)* | 0.083 | 1.11 (1.02–1.20)* | | 1.06 (0.97–1.16) | 0.493 | 1.04 (0.97–1.11) | | 1.02 (0.94–1.10) | 0.769 |  | |
| V | 1.77 (1.43–2.19)* | 2.08 (1.64–2.64)* | 0.229 | 1.25 (1.03–1.52)* | 1.64 (1.32–2.05)* | 0.078 | 1.33 (1.19–1.48)* | 1.49 (1.32–1.68)* | 0.094 | 1.11 (1.02–1.22)* | | 1.21 (1.09–1.34)* | 0.348 | 1.16 (1.05–1.27)* | | 1.12 (1.03–1.23)* | 0.702 | 1.05 (0.97–1.13) | | 1.04 (0.97–1.12) | 0.915 |  | |
| **Health limitation** |  |  |  |  |  |  |  |  |  |  | |  |  |  | |  |  |  | |  |  |  | |
| No | 1 | 1 |  | 1 | 1 | 1 | 1 | 1 | 1 | 1 | | 1 | 1 | 1 | | 1 | 1 | 1 | | 1 | 1 |  | |
| Yes | 1.16 (0.94–1.42) | 1.29 (1.11–1.50)* | 0.156 | 1.11 (0.93–1.33) | 1.15 (0.99–1.33) | 0.541 | 1.04 (0.92–1.18) | 1.06 (0.96–1.17) | 0.418 | 1.03 (0.91–1.16) | | 1.03 (0.94–1.14) | 0.622 | 1.00 (0.89–1.13) | | 0.99 (0.89–1.11) | 0.899 | 0.99 (0.89–1.11) | | 0.97 (0.88–1.08) | 0.888 |  | |
| **Deprivation index** |  |  |  |  |  |  |  |  |  |  | |  |  |  | |  |  |  | |  |  |  | |
| 1 | 1 | 1 |  | 1 | 1 | 1 | 1 | 1 | 1 | 1 | | 1 | 1 | 1 | | 1 | 1 | 1 | | 1 | 1 |  | |
| 2 | 1.01 (0.86–1.19) | 1.00 (0.86–1.17) | 0.991 | 0.94 (0.81–1.08) | 1.03 (0.90–1.17) | 0.360 | 1.00 (0.92–1.09) | 1.05 (0.97–1.14) | 0.336 | 0.96 (0.90–1.03) | | 1.03 (0.97–1.11) | 0.124 | 0.99 (0.92–1.07) | | 0.98 (0.91–1.05) | 0.785 | 0.97 (0.91–1.04) | | 0.99 (0.93–1.05) | 0.840 |  | |
| 3 | 1.18 (1.01–1.37)* | 1.21 (1.06–1.39)* | 0.817 | 0.99 (0.87–1.14) | 1.16 (1.03–1.30)* | 0.136 | 1.05 (0.97–1.14) | 1.06 (0.98–1.15) | 0.877 | 1.00 (0.93–1.07) | | 1.01 (0.94–1.08) | 0.960 | 1.05 (0.97–1.12) | | 1 (0.93–1.07) | 0.294 | 1.01 (0.95–1.08) | | 0.99 (0.94–1.05) | 0.563 |  | |
| 4 | 1.03 (0.88–1.22) | 1.17 (1.02–1.35)* | 0.306 | 0.93 (0.81–1.08) | 1.15 (1.02–1.30)* | 0.044* | 1.04 (0.96–1.13) | 1.08 (1.000–1.17) | 0.562 | 0.98 (0.92–1.05) | | 1.03 (0.96–1.10) | 0.357 | 1.02 (0.94–1.10) | | 1.01 (0.95–1.08) | 0.778 | 0.99 (0.93–1.05) | | 1.01 (0.95–1.06) | 0.775 |  | |
| 5 | 1.17 (0.99–1.38) | 1.19 (1.03–1.37)* | 0.900 | 0.98 (0.85–1.13) | 1.10 (0.97–1.24) | 0.372 | 1.08 (1.00–1.17) | 1.11 (1.03–1.20)* | 0.779 | 0.99 (0.93–1.06) | | 1.02 (0.95–1.08) | 0.778 | 1.02 (0.94–1.10) | | 1.03 (0.96–1.10) | 0.955 | 1.00 (0.93–1.07) | | 1.00 (0.94–1.06) | 0.848 |  | |

**Model 3**: Model 2+adjusted for tertile of use+chronic disease; **Model 4**: Model 3 adjusted for tool knowledge; **M**: Men; **W**: Women; **PR**: Prevalence ratio; **CI**: Confidence interval; *****: indicates statistical significance.
